1 **Full title:**

2 Smallpox bioterrorism scenarios and reactive intervention protocol: mathematical model-based  
3 analysis

4

5 **Short title:**

6 Mathematical model-based analysis of smallpox bioterrorism

7

8 **Author list:**

9 Youngsuk Ko<sup>1</sup>, Yubin Seo<sup>3</sup>, Jin Ju Park<sup>3</sup>, Eun Jung Kim<sup>4</sup>, Jong Youn Moon<sup>5</sup>, Tark Kim<sup>6</sup>, Joong Sik  
10 Eom<sup>7</sup>, Hong Sang Oh<sup>8</sup>, Arim Kim<sup>9</sup>, Jin Yong Kim<sup>10</sup>, Jacob Lee<sup>3\*</sup>, and Eunok Jung<sup>2\*</sup>

11

12 <sup>1</sup> Institute of Mathematical Sciences, Konkuk University, Seoul, Korea

13 <sup>2</sup> Department of Mathematics, Konkuk University, Seoul, Korea

14 <sup>3</sup> Division of Infectious Disease, Department of Internal Medicine, Kangnam Sacred Heart Hospital, College of  
15 Medicine, Hallym University, Seoul, Korea

16 <sup>4</sup> National Assembly Research Service, Seoul, Korea

17 <sup>5</sup> Department of preventive medicine, College of medicine, Gachon University, Incheon, Korea

18 <sup>6</sup> Division of Infectious Diseases, Soonchunhyang University Bucheon Hospital, Bucheon, Korea

19 <sup>7</sup> Division of Infectious Diseases, Department of Internal Medicine, Gil Medical Center, College of Medicine,  
20 Gachon University, Incheon, Korea

21 <sup>8</sup> Division of Infectious Disease, Department of Internal Medicine, Hallym University Sacred Heart Hospital,  
22 Gyeonggi-do, Korea

23 <sup>9</sup> Gachon Biomedical Convergence Institute, Gachon, Korea

24 <sup>10</sup> Division of Infectious Diseases, Department of Internal Medicine, Incheon Medical Center, Incheon, Korea

25 \*Corresponding author

26

**NOTE: This preprint reports new research that has not been certified by peer review and should not be used to guide clinical practice.**

27 **Abstract**

28 Smallpox, caused by the variola virus, is one of the most devastating diseases in human history and  
29 was eradicated through global vaccination efforts by 1980. Despite its eradication, the virus remains  
30 in high-security laboratories for research purposes, posing the potential risk of bioterrorism. This  
31 study developed a mathematical model to analyze potential smallpox epidemics by incorporating  
32 factors such as age groups, heterogeneous contact patterns, and various intervention strategies  
33 including contact tracing, ring vaccination, and mass vaccination. The model simulations indicated  
34 that the Republic of Korea's current plans for negative-pressure isolation beds should suffice under  
35 most scenarios, but extreme worst-case scenarios could overwhelm healthcare capacity. This study  
36 highlights the critical importance of non-pharmaceutical interventions and strategic vaccination  
37 prioritization for controlling outbreaks. These findings provide valuable guidance for public health  
38 officials and policymakers in preparing for potential bioterrorism threats and emerging infectious  
39 diseases. Furthermore, emphasizes the need for comprehensive preparedness and robust response  
40 strategies. The proposed framework applies to smallpox and to other infectious diseases, offering  
41 insights for future outbreak management.

42

43 **Abbreviations**

44 NPIs: Non-pharmaceutical interventions

45 PEP: Post-exposure prophylaxis

46 ROK: Republic of Korea

47 CrI: Credible interval

48 PRCC: Partial Rank Correlation Coefficient

49

## 50 **Introduction**

51 Smallpox, caused by the variola virus, is one of the most devastating diseases affecting humans(1).

52 With its origins traced back to ancient civilizations, smallpox has spread across continents. The

53 disease is characterized by a high fever, severe skin eruptions, and a significant fatality rate

54 (approximately 30%), making it a formidable threat to populations worldwide.

55 The pioneering findings of Jenner and concerted global efforts, including mass vaccination

56 campaigns, surveillance, and implementation of ring vaccination strategies, led to the gradual decline

57 of smallpox cases. Non-pharmaceutical interventions (NPIs), such as disease surveillance, case

58 finding, and contact tracing, are also crucial for containing the spread of the virus(2). Ring

59 vaccination involves vaccinating all individuals near a detected case to prevent the spread of the virus.

60 Additionally, post-exposure prophylaxis (PEP) has been used to vaccinate individuals exposed to the

61 virus, further preventing outbreaks(3,4). The World Health Organization (WHO) launched an

62 intensified eradication program in 1967, which culminated in the declaration of smallpox eradication

63 in 1980.

64 Despite its eradication, the variola virus remains in two high-security laboratories: the Centers for

65 Disease Control and Prevention in the United States and the State Research Center of Virology and

66 Biotechnology in Russia(5). The virus is retained for research purposes, including developing new

67 vaccines and treatments. However, the presence of these viral stocks poses the potential risk of

68 bioterrorism. Given the lack of widespread immunity in the current global population, the deliberate

69 release of the smallpox virus could lead to a catastrophic outbreak. Two notable laboratory-related

70 smallpox incidents underscored the importance of maintaining vigilance. In 1971, the Aral Smallpox

71 incident in Soviet Russia led to ten infections and three deaths(6). Similarly, in 1978, a laboratory

72 accident in Birmingham, England resulted in two infections and one death(7).

73 A notable scenario that underscores the potential threat of smallpox as a bioterrorism agent is Dark

74 Winter exercises (8). This senior-level bioterrorist attack simulation depicted a covert smallpox attack

75 in the United States starting in Oklahoma City and rapidly spreading to other states. The exercise

76 revealed significant gaps in the national emergency response, highlighting the challenges of

77 containing the outbreak, managing public panic, and maintaining essential services. Winter's findings  
78 emphasize the need for robust preparedness plans, including sufficient vaccine stockpiles, effective  
79 communication strategies, and coordinated efforts between public health and security agencies, to  
80 mitigate the impact of such a bioterrorism event.

81 Mathematical models are crucial in understanding and controlling infectious disease outbreaks,  
82 including smallpox, as demonstrated in various studies. Ferguson emphasized the effectiveness of  
83 targeted surveillance and containment interventions such as ring vaccination in controlling smallpox  
84 outbreaks, underscoring the need for a rapid response (9). Meltzer constructed a model to evaluate  
85 quarantine and vaccination interventions after a bioterrorist attack and demonstrated that a  
86 combination of these strategies was effective in halting disease transmission (10). Ohushima  
87 developed a model to predict smallpox outbreaks in Japan, evaluated the control measures, and found  
88 that mass vaccination was more effective than ring vaccination under certain conditions (11). Chun  
89 used epidemic modeling and tabletop exercises to prepare public health officials in the ROK for  
90 potential outbreaks, highlighting the importance of these tools in estimating cases, deaths, and  
91 resource shortages (12).

92 In this study, we developed a mathematical model to analyze potential smallpox epidemics by  
93 incorporating various realistic factors such as age groups and heterogeneous contact patterns. The  
94 model includes contact tracing, ring vaccination, and mass vaccination strategies and distinguishes  
95 severe cases among infected individuals to discuss the required capacity for severe patients in  
96 emergency scenarios. The insights gained from vaccination prioritization during the COVID-19  
97 pandemic were also analyzed in relation to potential smallpox scenarios. Given the threat of smallpox  
98 as a bioterrorism agent, this study evaluated reactive intervention protocols by simulating various  
99 outbreak scenarios and assessing the effectiveness of NPIs, vaccination strategies, and isolation  
100 facilities. These findings highlight the importance of early detection, rapid response, and strategic  
101 vaccination prioritization. The proposed framework addresses smallpox and offers insights applicable  
102 to other emerging infectious diseases, emphasizing the need for comprehensive preparedness in the  
103 face of potential bioterrorism threats.

104 **Materials and Methods**

105 **Mathematical modeling of smallpox epidemic**

106 To investigate the transmission dynamics of potential smallpox epidemics, we developed a  
107 susceptible-infectious-recovered-type mathematical model that reflects contact tracing, disease  
108 severity, age group, and ring/mass vaccination. The mathematical model is shown as a flow diagram  
109 in Figure 1. Age groups are denoted by subscript ( $i$ ) for each variable, and vaccinated individuals are  
110 denoted by superscript ( $v$ ). In this study, we categorized the population into 16 age groups, each  
111 spanning 5 years, ranging from 0–4 years to 65 years and older in the Republic of Korea (13).

112

113

114

115 Figure 1. Flow diagram of the mathematical model of the smallpox epidemic.

116

117 In general, Susceptible-Infectious-Recovered type models have the transmission rate, typically  
118 denoted by the symbol  $\beta$ , which consists of the contact rate per unit time ( $c$ ) and the probability of  
119 successful disease transmission ( $p$ ), that is,  $\beta = pc$ . In this study, we distinguished between those  
120 who had contact with infectious hosts but were not infected ( $C_i$ ) and those who were infected after  
121 contact ( $E_i$ ). We also considered both close contact ( $\lambda_i^A$ ) and social contact ( $\lambda_i^B$ ). Close contacts were  
122 incorporated based on a study by Prem et al.(14). Social contacts were assumed to be four times the  
123 number of contacts, excluding household contacts. The probability of successful disease transmission  
124 through close contact was set to 60%(15). Using this value and the next-generation matrix method, the  
125 basic reproductive number through close contact was calculated to be approximately four (16).  
126 Considering that the recorded basic reproductive number of smallpox is approximately six, the  
127 probability of successful disease transmission through casual contact was set at 10%(17).  
128 To incorporate contact tracing regardless of infection status, we used the symbol ( $q$ ) to represent the  
129 proportion of contact-traced individuals. Those who were traced after contact and those who were not  
130 traced were distinguished using a tilde symbol ( $\sim$ ). Here, casual contact was not traced. The infection  
131 transmission periods for traced and non-traced individuals were set based on the time from symptom  
132 onset to isolation during the COVID-19 pandemic in the ROK (18). We assumed that contact-traced  
133 individuals would be hospitalized/isolated relatively quickly (within 2.3 days,  $1/\alpha$ ) after symptom  
134 onset, while non-traced individuals would be isolated after 6.8 days ( $1/\tilde{\alpha}$ ), considering the time to the  
135 appearance of definitive smallpox symptoms (lesions)(19). The severity rate in the model ( $z_i$ ) was set  
136 to twice the infection fatality ratio. Thus, in the model simulations, half of the severe patients died,  
137 whereas there were no deaths among non-severe patients.  
138 Vaccination was applied in two forms in the model: mass vaccination ( $\mu_m$ ) and ring vaccination ( $\mu_r$ ).  
139 Ring vaccination was prioritized and administered after case isolation but not in those who had  
140 already developed symptoms. Patients exposed to the infection either recovered or continued to show  
141 symptoms depending on the effectiveness of PEP ( $e_{PEP}$ ). Even those who did not directly receive the  
142 effects of PEP experienced a reduction in severity/fatality rates due to partial effects. Mass  
143 vaccination was administered to the entire population outside the ring vaccination targets, and those

144 who had already been vaccinated were not revaccinated even if they were contact-traced. Those who  
 145 were isolated without infection or ring vaccination were discharged 19 days ( $1/l$ ) after isolation(20).  
 146 In response to the smallpox epidemic, we assumed that vaccinating 40 million people (approximately  
 147 80% of the population) would be necessary to achieve herd immunity. Vaccination can be slow  
 148 initially owing to the lack of available personnel who are educated and vaccinated. In the ROK, there  
 149 was a small-scale vaccination for healthcare workers during the global Mpox outbreak in 2022 in  
 150 response to the domestic influx (21). These individuals would be the first to start vaccination during a  
 151 smallpox epidemic and could vaccinate other healthcare workers and target populations. Thus, we  
 152 assumed the daily vaccination capacity follows a logistic growth model, considering the maximum  
 153 daily vaccination capacity during the COVID-19 pandemic, set at 1 million ( $\mu_{ub}$ ). The vaccination  
 154 process started with 1,000 vaccinations per day, with a logistic growth rate ( $r_v$ ) of 0.1, and all 40  
 155 million people were vaccinated after 110 days.

156 The model is formulated using ordinary differential equations as follows:

$$157 \quad \frac{dS_i}{dt} = -(\lambda_i^A + \lambda_i^B)S_i - \mu_m(S), \quad \frac{dS_i^v}{dt} = \mu_m(S) + \mu_m(\tilde{C}_i) + \mu_r(Q_i^s) + lQ_i^{sv} - (\lambda_i^A + \lambda_i^B)S_i^v,$$

$$158 \quad \frac{d\tilde{C}_i}{dt} = (1 - p^A)(1 - q)\lambda_i^A(S_i + \tilde{C}_i) + (1 - p^B)\lambda_i^B(S_i + \tilde{C}_i) - (\lambda_i^A + \lambda_i^B)\tilde{C}_i - \mu_m(\tilde{C}_i),$$

$$159 \quad \frac{dC_i}{dt} = (1 - p^A)q\lambda_i^A(S_i + \tilde{C}_i) + (1 - p^A)\lambda_i^A C_i + (1 - p^B)\lambda_i^B C_i - (\lambda_i^A + \lambda_i^B)C_i - \sigma C_i,$$

$$160 \quad \frac{d\tilde{C}_i^v}{dt} = (1 - p_v^A)(1 - q)\lambda_i^A(S_i^v + \tilde{C}_i^v) + (1 - p_v^B)\lambda_i^B(S_i^v + \tilde{C}_i^v) - (\lambda_i^A + \lambda_i^B)\tilde{C}_i^v,$$

$$161 \quad \frac{dC_i^v}{dt} = (1 - p_v^A)q\lambda_i^A(S_i^v + \tilde{C}_i^v) + (1 - p_v^A)\lambda_i^A C_i^v + (1 - p_v^B)\lambda_i^B C_i^v - (\lambda_i^A + \lambda_i^B)C_i^v - \sigma C_i^v,$$

$$162 \quad \frac{d\tilde{E}_i}{dt} = p^A(1 - q)\lambda_i^A(S_i + \tilde{C}_i) + p^B\lambda_i^B(S_i + \tilde{C}_i) - \kappa\tilde{E}_i - \mu_m(\tilde{E}_i),$$

$$163 \quad \frac{dE_i}{dt} = p^Aq\lambda_i^A(S_i + \tilde{C}_i) + p^A\lambda_i^A C_i + p^B\lambda_i^B C_i - \kappa E_i - \sigma E_i,$$

$$164 \quad \frac{d\tilde{E}_i^v}{dt} = (1 - e_{pep})\mu_m(\tilde{E}_i) + p_v^A(1 - q)\lambda_i^A(S_i^v + \tilde{C}_i^v) + p_v^B\lambda_i^B(S_i^v + \tilde{C}_i^v) - \kappa\tilde{E}_i^v,$$



$$165 \quad \frac{dE_i^v}{dt} = p_v^A q \lambda_i^A (S_i^v + \tilde{C}_i^v) + p_v^A \lambda_i^A C_i^v + p_v^B \lambda_i^B C_i^v - \kappa E_i^v - \sigma E_i^v ,$$

$$166 \quad \frac{d\tilde{I}_i}{dt} = \kappa \tilde{E}_i - \tilde{\alpha} \tilde{I}_i , \quad \frac{dI_i}{dt} = \kappa E_i - \alpha I_i ,$$

$$167 \quad \frac{d\tilde{I}_i^v}{dt} = \kappa \tilde{E}_i^v - \tilde{\alpha} \tilde{I}_i^v , \quad \frac{dI_i^v}{dt} = \kappa E_i^v - \alpha I_i^v ,$$

$$168 \quad \frac{dQ_i^s}{dt} = \sigma C_i - \mu_r(Q_i^s) , \quad \frac{dQ_i^{sv}}{dt} = \sigma C_i^v - l Q_i^{sv} , \quad \frac{dQ_i^e}{dt} = \sigma E_i - \mu_r(Q_i^e) ,$$

$$169 \quad \frac{dQ_i}{dt} = (1 - z_i)(\tilde{\alpha} \tilde{I}_i + \alpha I_i) - \gamma_Q Q_i ,$$

$$170 \quad \frac{dQ_i^v}{dt} = (1 - z_i^v)((1 - e_{PEP})\mu_r(Q_i^e) + \tilde{\alpha} \tilde{I}_i^v + \alpha I_i^v + \sigma E_i^v) - \gamma_Q Q_i^v ,$$

$$171 \quad \frac{dH_i}{dt} = z_i(\tilde{\alpha} \tilde{I}_i + \alpha I_i) - \gamma_H H_i ,$$

$$172 \quad \frac{dH_i^v}{dt} = z_i^v((1 - e_{PEP})\mu_r(Q_i^e) + \tilde{\alpha} \tilde{I}_i^v + \alpha I_i^v + \sigma E_i^v) - \gamma_H H_i^v ,$$

$$173 \quad \frac{dR}{dt} = e_{PEP}(\mu_m(\tilde{E}_i) + \mu_r(Q_i^e)) + \gamma_Q(Q_i + Q_i^v) + (1 - f)\gamma_H(H_i + H_i^v) ,$$

$$174 \quad \lambda_i^A = \sum_j \frac{c_{ij}^A(I_j + I_j^v + \tilde{I}_j + \tilde{I}_j^v)}{N} , \quad \lambda_i^B = \sum_j \frac{c_{ij}^B(I_j + I_j^v + \tilde{I}_j + \tilde{I}_j^v)}{N} ,$$

$$175 \quad N = \sum_i S_i + S_i^v + \tilde{C}_i + C_i + \tilde{C}_i^v + C_i^v + \tilde{E}_i + E_i + \tilde{E}_i^v + E_i^v + \tilde{I}_i + I_i + \tilde{I}_i^v + I_i^v + R_i ,$$

$$176 \quad \mu(t) = \frac{\mu_{ub}}{1 + \exp(-r_v(t - t_0))} ,$$

$$177 \quad \mu_r^* = \min\left(\mu(t), \sum_i Q_i^s + Q_i^e\right) ,$$

$$178 \quad \mu_r(X) = \mu_r^* \frac{X}{\sum_i Q_i^s + Q_i^e} ,$$

$$179 \quad \mu_m(X) = (\mu(t) - \mu_r^*) \frac{X}{\sum_i S_i + \tilde{C}_i + \tilde{E}_i} .$$

180 The model parameters are listed in Table 1. As experienced during the COVID-19 pandemic, the scale  
181 of the potential outbreaks remains uncertain. To reflect this, model simulations were conducted as a

182 stochastic process using the Tau-leaping method. We ran 1000 simulations for each model setting. As  
183 an initial condition for the model simulation, all population groups were assumed to be in a  
184 susceptible state. The number of exposed hosts was set to 100 and proportionally distributed  
185 according to the population ratio of each group. Table 2 lists the population numbers in each group.  
186

187 Table 1. Model parameters

| Symbol             | Description                                                         | Value                                                               | Reference       |
|--------------------|---------------------------------------------------------------------|---------------------------------------------------------------------|-----------------|
| $1/\tilde{\alpha}$ | Infectious period of contact-unidentified hosts                     | 6.8 days                                                            | (18,19)         |
| $1/\alpha$         | Infectious period of contact-identified hosts                       | 2.3 days                                                            | (18)            |
| $p_A$              | Probability of successful disease transmission per close contact    | 0.6                                                                 | (15,16,18)      |
| $p_B$              | Probability of successful disease transmission per casual contact   | 0.1                                                                 | (15,16,18)      |
| $q$                | Contact-identification ratio                                        | 0.8                                                                 | Assumed         |
| $1/l$              | Isolation duration of uninfected case                               | 19 days                                                             | (20)            |
| $1/\sigma$         | Contact tracing duration                                            | 2 days                                                              | Assumed         |
| $1/\kappa$         | Incubation period                                                   | 12 days                                                             | (22)            |
| $1/\gamma_Q$       | Isolation duration of non-severe case                               | 28 days                                                             | (22)            |
| $1/\gamma_H$       | Duration from hospitalization to recovery (or death) of severe case | 13 days                                                             | (1)             |
| $z_i$              | Age dependent severity rate                                         | 0.83 (1)<br>0.47 (2,3)<br>0.61 (4,5)<br>0.59 (6-10)<br>0.64 (11-16) | (23)            |
| $f$                | Fatality rate of severe case                                        | 0.5                                                                 | Assumed,<br>(1) |
| $e$                | Preventive vaccine effectiveness against infection                  | 0.78                                                                | (24)            |
| $e_H$              | Vaccine effectiveness against severity                              | 0.97                                                                | (24)            |
| $e_{pep}$          | Post-exposure prophylaxis vaccine effectiveness against infection   | 0.5                                                                 | (25)            |

188

189 Table 2. Population size by age group

| Age group | Age range         | Population size |
|-----------|-------------------|-----------------|
| 1         | 0-4 years         | 1455094         |
| 2         | 5-9 years         | 2151118         |
| 3         | 10-14 years       | 2368657         |
| 4         | 15-19 years       | 2330189         |
| 5         | 20-24 years       | 3011576         |
| 6         | 25-29 years       | 3501534         |
| 7         | 30-34 years       | 3278501         |
| 8         | 35-39 years       | 3362054         |
| 9         | 40-44 years       | 4047017         |
| 10        | 45-49 years       | 4075006         |
| 11        | 50-54 years       | 4543049         |
| 12        | 55-59 years       | 4102783         |
| 13        | 60-64 years       | 4185467         |
| 14        | 65-69 years       | 3118100         |
| 15        | 70-74 years       | 2192898         |
| 16        | Age over 75 years | 3835398         |

190

191 **Baseline model simulation scenario**

192 The simulation time was set as 365 days. The baseline model simulation scenario consisted of three  
193 phases following the initial exposure:

- 194 ▶ Pre-declaration (Phase 1): This phase represents the period during which the occurrence of the  
195 outbreak has not yet been recognized. No NPIs or vaccination measures were in place during  
196 this phase, which lasted for 28 days after the initial exposure. This is the worst-case scenario,  
197 set at a realistic level, considering the incubation period, initial symptoms, and occurrence of  
198 rashes.
- 199 ▶ Post-declaration (Phase 2): This phase begins when the outbreak is first recognized, and  
200 contact tracing and social distancing (NPIs) are implemented. However, vaccination is not yet  
201 feasible because of the time required for preparation, e.g., training for medical personnel. This  
202 phase lasted for three days. It was assumed that social distancing would reduce the total  
203 contact rate by 60%.
- 204 ▶ Post-vaccination (Phase 3): This phase marks the beginning of vaccination. Vaccination  
205 continued until 40 million people had been vaccinated. This phase lasted for 334 days.  
206 Vaccination was administered simultaneously to all age groups, and the amount of vaccines  
207 administered was proportional to the population of each group; that is, there was no vaccine  
208 prioritization.

209  
210 **Scenarios considering vaccine prioritization**

211 Vaccination was not prioritized in the baseline scenario considered in this study. However, as  
212 experienced by most countries during the COVID-19 pandemic, prioritizing vaccination may be a  
213 more realistic approach. We defined four criteria for the prioritization scenarios: ascending age,  
214 descending age, prioritizing age groups with higher transmission risk, and prioritizing age groups with  
215 higher severity/death risk. The age groups with higher transmission risk were calculated based on the  
216 contact rate and the probability of successful disease transmission, and the order was as follows: age  
217 groups 4 (15-19 year), 3 (10-14 year), 9 (40-44 year), 8 (35-39 year), 7 (30-34 year), 6 (25-29 year),

218 10 (45-49 year), 11 (50-54 year), 5 (20-24 year), 2 (5-9 year), 12 (55-59 year), 13 (60-64 year), 1 (0-4  
219 year), 14 (65-69 year), 15 (70-74 year), 16 (75+ year).

220 **Results**

221 **Baseline scenario simulation**

222 Figure 2 shows the model simulation results for the confirmed cases (transition from infectious to  
223 isolated) and isolated patients. The curves represent the mean values of the model simulations, and  
224 shaded areas indicate the 95% credible interval (CrI). The red graph shows the daily confirmed cases,  
225 whereas the blue curves represent isolated patients. Among the blue curves, the solid and dashed lines  
226 indicate patients with non-severe and severe patients.

227 Daily confirmed cases increased sharply (mean 1167, maximum 1602 in 95% CrI) owing to contact  
228 tracing implemented at the initial outbreak recognition, and then decreased, followed by a gradual  
229 increase, and finally decreased again owing to herd immunity from vaccination. The number of non-  
230 severe patients reached a mean of 3750 (maximum 5422 in 95% CrI) after 114 days of spread,  
231 whereas that of severe patients reached a mean of 1235 (maximum 1838 in 95% CrI) after 99 days of  
232 exposure.

233

234

235

236 Figure 2. Baseline scenario simulation results. Curves indicate mean simulation results and shaded  
237 areas indicate the 95% credible interval.

238

239

240 The confirmed cases and deaths observed in the simulation runs are presented in Figure 3 using box-  
241 and-whisker plots. Panels A and B show the confirmed cases, and panels C and D show the number of  
242 deaths. The total number of confirmed cases was 36600 (95% CrI [24253, 51500]) and the total  
243 number of deaths was 5345 (95% CrI [3472, 7545]). Age group 9 (40–44 years) had the highest  
244 number of confirmed cases, with a mean of 4241 (95% CrI [2846, 5969]). Group 11 (50–54 years)  
245 had the highest number of deaths, with a mean age of 677 years (95% CrI [447, 936]). The age group  
246 0–4 years had the lowest number of confirmed cases (mean 361, 95% CrI 237, 513]) and deaths  
247 (mean 68, 95% CrI [41, 101]).

248 In addition to the baseline scenario, the results for different initial numbers and logistic growth rates  
249 for vaccinations and the varying effects of social distancing on contact reduction are listed in Tables  
250 3–5.

251



252

253 Figure 3. Outbreak outcomes from the baseline scenario simulations: Distribution of the number of  
254 confirmed cases by age (A) and total (B), deaths by age (C) and total (D).

255

256 Table 3. Mean and 95% CrI of outbreak outcomes with a 50% reduction in contacts due to social  
257 distancing.

| Initial vaccination number | Growth rate    | Confirmed cases         | Deaths               | Peak severe patients |
|----------------------------|----------------|-------------------------|----------------------|----------------------|
| 1000<br>(baseline)         | 0.05           | 260458 [170462, 354688] | 34255 [22388, 46734] | 7608 [4983, 10423]   |
|                            | 0.1 (baseline) | 90947 [60018, 127048]   | 11890 [7842, 16516]  | 3182 [2080, 4452]    |
|                            | 0.5            | 29323 [19519, 40916]    | 3816 [2588, 5298]    | 1369 [909, 1915]     |
| 5000                       | 0.05           | 144457 [94173, 199367]  | 19008 [12540, 25960] | 4411 [2875, 6109]    |
|                            | 0.1 (baseline) | 64585 [41862, 90666]    | 8451 [5588, 11793]   | 2381 [1562, 3349]    |
|                            | 0.5            | 26828 [17542, 37368]    | 3491 [2316, 4847]    | 1282 [849, 1796]     |
| 10000                      | 0.05           | 111421 [73076, 157301]  | 14671 [9640, 20653]  | 3507 [2303, 4973]    |
|                            | 0.1 (baseline) | 56267 [38326, 76475]    | 7358 [5030, 9959]    | 2135 [1458, 2922]    |
|                            | 0.5            | 26075 [17039, 37098]    | 3391 [2269, 4682]    | 1261 [819, 1759]     |

258

260 Table 4. Mean and 95% CrI of outbreak outcomes with a 60% reduction in contacts due to social  
261 distancing.

| Initial vaccination number | Growth rate    | Confirmed cases      | Deaths             | Peak severe patients |
|----------------------------|----------------|----------------------|--------------------|----------------------|
| 1000<br>(baseline)         | 0.05           | 60356 [40271, 84492] | 8894 [5950, 12436] | 1475 [985, 2094]     |
|                            | 0.1 (baseline) | 36886 [24398, 51467] | 5391 [3581, 7513]  | 1281 [838, 1786]     |
|                            | 0.5            | 18611 [12524, 25865] | 2676 [1827, 3706]  | 1048 [707, 1455]     |
| 5000                       | 0.05           | 46071 [30001, 63246] | 6784 [4461, 9343]  | 1318 [848, 1808]     |
|                            | 0.1 (baseline) | 30803 [20538, 42278] | 4495 [2996, 6173]  | 1208 [797, 1682]     |
|                            | 0.5            | 17614 [11806, 24104] | 2530 [1713, 3410]  | 1028 [691, 1411]     |
| 10000                      | 0.05           | 40645 [26835, 56652] | 5981 [3918, 8371]  | 1261 [827, 1787]     |
|                            | 0.1 (baseline) | 28100 [19317, 39537] | 4098 [2792, 5702]  | 1168 [790, 1642]     |
|                            | 0.5            | 17103 [11403, 23652] | 2457 [1669, 3365]  | 1012 [684, 1404]     |

262

263

264 Table 5. Mean and 95% CrI of outbreak outcomes with a 70% reduction in contacts due to social  
 265 distancing.

| Initial vaccination number | Growth rate    | Confirmed cases      | Deaths            | Peak severe patients |
|----------------------------|----------------|----------------------|-------------------|----------------------|
| 1000<br>(baseline)         | 0.05           | 20749 [13713, 29494] | 3370 [2225, 4805] | 894 [602, 1256]      |
|                            | 0.1 (baseline) | 17565 [11933, 23971] | 2851 [1947, 3852] | 881 [605, 1186]      |
|                            | 0.5            | 12510 [8588, 17000]  | 1985 [1358, 2681] | 890 [611, 1224]      |
| 5000                       | 0.05           | 19069 [13225, 26800] | 3101 [2105, 4343] | 891 [625, 1237]      |
|                            | 0.1 (baseline) | 16446 [11093, 22420] | 2663 [1853, 3608] | 893 [596, 1228]      |
|                            | 0.5            | 12006 [8172, 16475]  | 1898 [1321, 2584] | 884 [598, 1215]      |
| 10000                      | 0.05           | 18288 [12598, 25139] | 2975 [2042, 4084] | 891 [625, 1210]      |
|                            | 0.1 (baseline) | 15724 [11007, 21809] | 2545 [1781, 3533] | 889 [609, 1224]      |
|                            | 0.5            | 11900 [8028, 16371]  | 1879 [1285, 2577] | 890 [596, 1228]      |

266

267

268 Figure 4 shows the distribution of hosts who had contact with infected individuals at outbreak  
269 recognition 28 days after initial exposure. The average numbers of hosts who had contact (whether  
270 they were infected or not), hosts during the incubation period, and hosts in the contagious stage were  
271 5618 (95% CrI [3786, 7776]), 3401 (95% CrI [2288, 4706]), and 926 (95% CrI [623, 1275]),  
272 respectively.

273

274

275

276 Figure 4. Distribution of the number of hosts who had hazardous contact until the outbreak  
277 recognition in different stages.

278

279 Figure 5 shows the mean daily vaccination number (panel A), the distribution of administered ring  
280 vaccinations in the simulation runs (panel B), and the ring vaccination period (panel C). In this study,  
281 the ring vaccination period was considered the point at which the mass vaccination exceeded the  
282 amount of ring vaccination. The average number of ring vaccinations administered was 28750 (95%  
283 CrI [19145,40218]), and the vaccination period lasted an average of 5.53 days (95% CrI [3.5, 8]).

284

285

286

287 Figure 5. Vaccination number in the baseline scenario simulations: Mean daily vaccination number  
288 (A), distribution of administered ring vaccination, and period (B,C).

289

290

291 **Impact of vaccine prioritization**

292 The simulation results, including the baseline scenario and scenarios with vaccine prioritization, are  
293 shown in Figure 6. Panels A and B show the daily numbers of confirmed and severe cases,  
294 respectively. Compared with the baseline scenario, prioritizing vaccination for age groups with a  
295 higher transmission risk (purple) showed a decrease, whereas prioritizing vaccination for older age  
296 groups (yellow) showed a significant increase. Table 5 lists the odds ratios for cumulative confirmed  
297 cases, deaths, and the peak number of severe patients compared to the baseline scenario. When  
298 prioritization based on transmissibility was applied, the odds ratios for all metrics were below one,  
299 within the confidence interval. Conversely, when prioritization based on descending age was applied,  
300 the odds ratios for all metrics exceeded one.

301

302

303

304 Figure 6. Simulation results considering vaccine prioritization: Daily confirmed cases (A),  
305 administered to severe patients (B).

306

307 Table 6. Odds ratios and confidence intervals for scenarios considering vaccine prioritization  
308 compared to the baseline scenario.

| Vaccine prioritization | Confirmed cases   | Deaths            | Peak number of administered patients |
|------------------------|-------------------|-------------------|--------------------------------------|
| Ascending age          | 0.97, [0.95 0.98] | 0.98, [0.96 0.99] | 1.02, [1.00 1.03]                    |
| Descending age         | 1.07, [1.06 1.09] | 1.08, [1.06 1.09] | 1.04, [1.02 1.06]                    |
| Transmissibility       | 0.89, [0.87 0.90] | 0.90, [0.89 0.92] | 0.96, [0.94 0.97]                    |
| Fatality               | 1.03, [1.02 1.05] | 1.03, [1.01 1.05] | 1.00, [0.98 1.01]                    |

309

310



## 311 Sensitivity analysis

312 To address the inherent uncertainties in these values and conduct a comprehensive sensitivity analysis  
313 of the model outcomes, we measured the partial rank correlation coefficient (PRCC) values using  
314 Latin hypercube sampling. PRCC is a statistical measure used to determine the strength and direction  
315 of the relationship between two variables while controlling for the effects of other variables. In  
316 sensitivity analysis, it is particularly useful to identify the parameters that have the most significant  
317 impact on the output of a model. A detailed description of this method is provided in reference (26).  
318 We considered the following model inputs: outbreak recognition timing, impact of social distancing  
319 on contact number, infectious period of traced and non-traced cases, contact identification ratio, and  
320 logistic growth rate of the daily vaccination number. The model outputs were set as the cumulative  
321 confirmed cases and deaths, and the peak number of administered severe patients.  
322 Figure 7 shows the measured absolute values of PRCC over time. The colors in the graph represent  
323 the model inputs. Solid curves indicate the values for cumulative confirmed cases, whereas solid  
324 curves indicate the values for cumulative deaths. The order of the absolute PRCC values for the model  
325 inputs was the same regardless of whether the model output was cumulative confirmed cases or  
326 deaths. Based on the final absolute PRCC values, the timing of outbreak recognition had the highest  
327 value, with 0.90 for cumulative confirmed cases and deaths. The contact identification ratio initially  
328 had a relatively high absolute PRCC (0.29) for cumulative confirmed cases but decreased to 0.01,  
329 resulting in the lowest PRCC. Table 7 lists the ranges of PRCC values. In contrast to Figure 7, the  
330 absolute value of the PRCC for the growth rate of daily vaccination was the second smallest when the  
331 considered model output peaked for severe patients. Additionally, outbreak recognition timing had the  
332 highest absolute PRCC.

333

334

335 Figure 7. Absolute value of PRCC over time. Solid lines represent the value for cumulative confirmed  
336 cases, while dashed lines represent the value for cumulative deaths.

337

338 Table 7. The final value and range of PRCC of model inputs considering different model outputs.  
 339 There is no range if the target model output is the peak number of severe patients as there is a one-  
 340 time point of it.

| Model input                          | Model output               |                     |                      |
|--------------------------------------|----------------------------|---------------------|----------------------|
|                                      | Cumulative confirmed cases | Cumulative deaths   | Peak severe patients |
| Outbreak recognition timing          | 0.90 [0, 0.93]             | 0.90 [-0.19, 0.93]  | 0.88                 |
| Impact of social distancing          | -0.93 [-0.93, 0.01]        | -0.91 [-0.91, 0]    | -0.85                |
| Isolation rate for traced cases      | -0.28 [-0.28, 0]           | -0.32 [-0.32, 0.04] | -0.27                |
| Isolation rate for non-traced cases  | -0.89 [-0.89, -0.26]       | -0.88 [-0.88, 0.2]  | -0.81                |
| Contact-identification ratio         | -0.01 [-0.29, -0.01]       | -0.01 [-0.01, 0.01] | -0.02                |
| Growth rate of the daily vaccination | -0.31 [-0.31, 0]           | -0.33 [-0.33, 0]    | -0.16                |

341

342 **Discussion**

343 The model simulation showed a rapid increase in confirmed cases upon initial detection, followed by  
344 a gradual increase in the number of severely ill patients. By 2024, the ROK plans to expand the  
345 number of negative-pressure isolation beds to 3500 to respond to emerging infectious diseases(27).

346 According to the baseline scenario results, even in the worst case within the 95% CrI, the peak  
347 administered to severely ill patients was 1800 (Figure 2), indicating that the current plan should  
348 prevent a shortage of beds. However, in an extreme worst-case scenario, where the vaccination rate is  
349 low and the impact of social distancing is weak (upper row in Table 3), the number of administered  
350 severe cases could reach up to 7600, posing a significant risk. However, if the effectiveness of social  
351 distancing reaches at least 0.6, dangerous situations are avoided. Therefore, the results suggest that a  
352 minimum level of NPIs required during a smallpox outbreak. This level was measured to be near the  
353 level of social distancing stage 2 in previous COVID-19 studies and is not an unrealistic measure in a  
354 bioterrorism situation where nationwide interventions would be stricter.

355 The parameter sensitivity analysis results provided additional support for the basic model simulation  
356 outcomes. The analysis revealed that both deaths and confirmed cases were highly sensitive to  
357 recognition timing, impact of social distancing, and isolation rate for non-traced cases (Figure 7 and  
358 Table 7). This underscores the significant role of NPIs in achieving herd immunity through  
359 vaccination.

360 The distribution of hosts with contagious contacts at the initial outbreak recognition (Figure 4)  
361 represents the minimum number of ring vaccination targets that need to be considered immediately.  
362 Considering the additional real-time increase in the number of contacts and exposed individuals, the  
363 distribution shown in Figure 5 indicates the overall scope of the ring vaccination plan. Although these  
364 individuals represented a small proportion (approximately 0.1%) of the total vaccination scale, ring  
365 vaccination was primarily conducted during the first week of the initial vaccination period. Our  
366 findings serve as a basis for determining the operation and number of distribution points during this  
367 period.

368 Determining vaccine priorities is challenging because of various social, economic, and ethical issues.

369 Similar problems have been encountered during the COVID-19 pandemic. Prioritizing vaccination for  
370 the elderly, who have higher severity/fatality rates, was the best strategy for minimizing deaths when  
371 social distancing measures were in place to reduce the effective reproduction number to  
372 approximately one (28,29). However, if the effective reproduction number increases, prioritizing the  
373 elderly would be less effective than vaccinating younger adults in minimizing deaths. The study was  
374 based on the original strain of COVID-19, which had a basic reproductive number of approximately  
375 three, roughly half of that of smallpox. This implies that strong NPIs can effectively suppress the  
376 spread. Conversely, for smallpox, for which moderate levels of NPIs were not sufficient to control the  
377 spread, prioritizing vaccination for groups with higher transmission rates was more effective in  
378 reducing deaths. Prioritizing the elderly yielded the least favorable results. If the vaccination history  
379 of the elderly, which was not considered in this study, were accounted for, they would likely have a  
380 relatively lower severity/fatality rate compared to other age groups, further diminishing the  
381 effectiveness of the first vaccination strategy.

382 The limitations of this study are as follows. For social contacts, we only used estimates based on close  
383 contacts. Age-specific severity rates were derived from data that included both vaccinated and  
384 unvaccinated individuals, which may differ from the actual values. We did consider the smallpox  
385 vaccinations administered in the ROK until the early 1970s and rather assumed that all population  
386 groups were susceptible. However, despite the lack of vaccine effectiveness against infection, the  
387 elderly might have a lower severe/fatality rate than other age groups due to their vaccination history.  
388 Finally, although the smallpox vaccine can have significant side effects, we did not incorporate these  
389 side effects into our model. This was because vaccination coverage was fixed. Future studies will  
390 focus on analyzing optimal vaccination strategies, taking into account side effects, spatial  
391 heterogeneity, and regional lockdowns.

392 **Conclusion**

393 Based on the findings of this study and considering realistic intervention scenarios and outbreak  
394 situations, we propose an appropriate number of isolation facilities for severely ill patients and the  
395 necessary level of initial social distancing. Various simulations have highlighted the critical  
396 importance of early detection and rapid responses to mitigate the impact of smallpox outbreaks. These  
397 results underscore the need for robust preparedness plans that include vaccination and NPIs.  
398 Our study emphasizes the importance of strategic vaccination prioritization and the role of NPIs in  
399 controlling outbreaks. The insights gained from this study provide valuable guidance to public health  
400 officials and policymakers in preparing for and responding to potential bioterrorism threats and  
401 emerging infectious diseases. The critical importance of early detection, rapid response, and  
402 comprehensive preparedness cannot be overstated when safeguarding public health.  
403 The overall framework of this study applies to smallpox and other emerging infectious diseases that  
404 may spread to humans in the future. By incorporating parameters similar to those applied in this  
405 study, response strategy scenarios can be developed for diseases that can be controlled using currently  
406 available vaccines. Conversely, for novel diseases with significant time requirements for vaccine  
407 development, this framework can be adapted to simulate the post-declaration phase responses.  
408

409 **Acknowledgement**

410 This research was supported by the Government-wide R&D Fund Project for Infectious Disease  
411 Research (GFID), Republic of Korea (grant No. HG23C1629). This work was supported by the  
412 Research Program funded by the Korea Disease Control and Prevention Agency (정책, 150).  
413

414 **Reference**

- 415 1. Fenner F, Henderson DA, Arita I, Ježek Z, Ladnyi ID. Smallpox and its eradication continued.  
416 1988.
- 417 2. Henderson DA. Principles and lessons from the smallpox eradication programme. Bull World  
418 Health Organ. 1987;65(4):535.
- 419 3. Kretzschmar M, Van den Hof S, Wallinga J, Van Wijngaarden J. Ring vaccination and  
420 smallpox control. Emerg Infect Dis. 2004;10(5):832.
- 421 4. Keckler MS, Reynolds MG, Damon IK, Karem KL. The effects of post-exposure smallpox  
422 vaccination on clinical disease presentation: addressing the data gaps between historical  
423 epidemiology and modern surrogate model data. Vaccine. 2013;31(45):5192–201.
- 424 5. Tucker JB. Breaking the deadlock over destruction of the smallpox virus stocks. Biosecur  
425 Bioterror. 2011;9(1):55–67.
- 426 6. Zelicoff AP. An epidemiological analysis of the 1971 smallpox outbreak in Aralsk,  
427 Kazakhstan. Crit Rev Microbiol. 2003;29(2):97–108.
- 428 7. Harling R, Morgan D, Edmunds WJ, Campbell H. Interim smallpox guidelines for the United  
429 Kingdom: Developing new policies from old evidence. Vol. 325, BMJ. British Medical  
430 Journal Publishing Group; 2002. p. 1371–2.
- 431 8. O’Toole T, Mair M, Inglesby T V. Shining light on " Dark Winter". Clinical Infectious  
432 Diseases. 2002;972–83.
- 433 9. Ferguson NM, Keeling MJ, John Edmunds W, Gani R, Grenfell BT, Anderson RM, et al.  
434 Planning for smallpox outbreaks. Nature. 2003;425(6959):681–5.
- 435 10. Meltzer MI, Damon I, LeDuc JW, Millar JD. Modeling potential responses to smallpox as a  
436 bioterrorist weapon. Emerg Infect Dis. 2001;7(6):959.
- 437 11. Ohkusa Y, Taniguchi K, Okubo I. Prediction of smallpox outbreak and evaluation of control-  
438 measure policy in Japan, using a mathematical model. Journal of Infection and Chemotherapy.  
439 2005;11(2):71–80.
- 440 12. Chun BC. Epidemic modeling and Table-top Exercise for Emerging Infectious Diseases in  
441 Korea. Epidemiol Health. 2006;28(1):47–63.
- 442 13. Ministry of the Interior and Safety. Population Status by Age and Administrative District  
443 [Internet]. [cited 2024 Sep 23]. Available from: <https://jumin.mois.go.kr/ageStatMonth.do>
- 444 14. Prem K, Cook AR, Jit M. Projecting social contact matrices in 152 countries using contact  
445 surveys and demographic data. PLoS Comput Biol. 2017;13(9):e1005697.
- 446 15. Centers for Disease Control and Prevention. Smallpox-Transmission [Internet]. [cited 2024  
447 Sep 23]. Available from: <https://www.cdc.gov/smallpox/transmission/index.html>
- 448 16. Diekmann O, Heesterbeek JAP, Roberts MG. The construction of next-generation matrices for  
449 compartmental epidemic models. J R Soc Interface. 2010;7(47):873–85.
- 450 17. Gani R, Leach S. Transmission potential of smallpox in contemporary populations. Nature.  
451 2001;414(6865):748–51.
- 452 18. Shim E, Choi W, Song Y. Clinical time delay distributions of COVID-19 in 2020–2022 in the  
453 Republic of Korea: inferences from a nationwide database analysis. J Clin Med.  
454 2022;11(12):3269.

- 455 19. G. Bras. *The Morbid Anatomy of Smallpox*. 4th ed. Vol. 4. *Documenta de Medicina*  
456 *Geographica et Tropica*; 1952. 303–351 p.
- 457 20. Korea Disease Control and Prevention Agency. *Guidelines for Responding to Class 1*  
458 *Infectious Diseases* [Internet]. 2024 [cited 2024 Sep 23]. Available from:  
459 <https://www.kdca.go.kr/contents.es?mid=a20301110100>
- 460 21. Yonhap News Agency. *First vaccination of medical staff against monkeypox... Vaccination is*  
461 *tricky* [Internet]. [cited 2024 Sep 23]. Available from:  
462 <https://www.yna.co.kr/view/MYH20220627014500641>
- 463 22. Centers for Disease Control and Prevention. *Smallpox-symptoms* [Internet]. [cited 2024 Sep  
464 23]. Available from: <https://www.cdc.gov/smallpox/symptoms/index.html>
- 465 23. Mazumder DNG, De S, Mitra AC, Mukherjee MK. *Clinical observations on smallpox: a study*  
466 *of 1233 patients admitted to the Infectious Diseases Hospital, Calcutta, during 1973*. *Bull*  
467 *World Health Organ*. 1975;52(3):301.
- 468 24. Eichner M. *Analysis of historical data suggests long-lasting protective effects of smallpox*  
469 *vaccination*. *Am J Epidemiol*. 2003;158(8):717–23.
- 470 25. Mohanty B, Costantino V, Narain J, Chughtai AA, Das A, MacIntyre CR. *Modelling the*  
471 *impact of a smallpox attack in India and influence of disease control measures*. *BMJ Open*.  
472 2020;10(12):e038480.
- 473 26. Helton JC, Davis FJ. *Latin hypercube sampling and the propagation of uncertainty in analyses*  
474 *of complex systems*. *Reliab Eng Syst Saf*. 2003;81(1):23–69.
- 475 27. Korea Disease Control and Prevention Agency. [May 11th, Thursday, Regular Briefing Press  
476 Release] *Promoting the Return to Normal Life from the COVID-19 Crisis* [Internet]. [cited  
477 2024 Sep 23]. Available from:  
478 [https://www.kdca.go.kr/board/board.es?mid=a20501010000&bid=0015&list\\_no=722503&cg\\_](https://www.kdca.go.kr/board/board.es?mid=a20501010000&bid=0015&list_no=722503&cg_code=&act=view&nPage=1)  
479 [code=&act=view&nPage=1](https://www.kdca.go.kr/board/board.es?mid=a20501010000&bid=0015&list_no=722503&cg_code=&act=view&nPage=1)
- 480 28. Bubar KM, Reinholt K, Kissler SM, Lipsitch M, Cobey S, Grad YH, et al. *Model-informed*  
481 *COVID-19 vaccine prioritization strategies by age and serostatus*. *Science* (1979).  
482 2021;371(6352):916–21.
- 483 29. Ko Y, Lee J, Kim Y, Kwon D, Jung E. *COVID-19 vaccine priority strategy using a*  
484 *heterogenous transmission model based on maximum likelihood estimation in the Republic of*  
485 *Korea*. *Int J Environ Res Public Health*. 2021;18(12):6469.
- 486



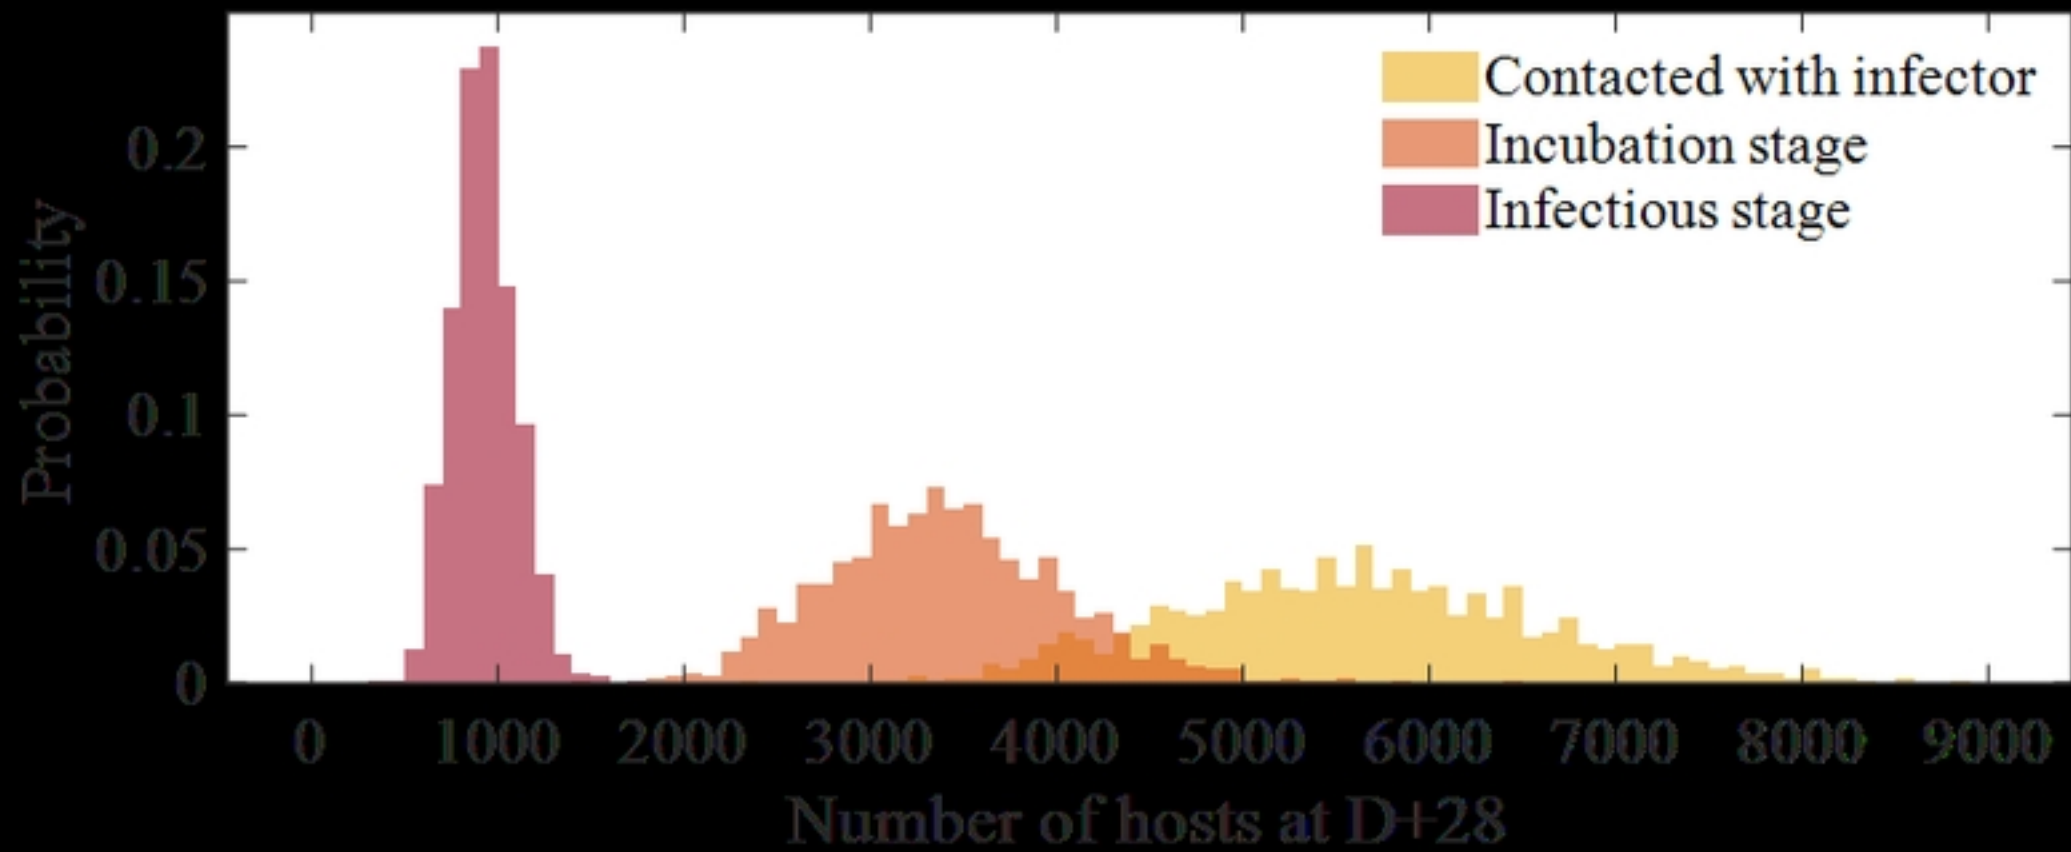

Figure 4

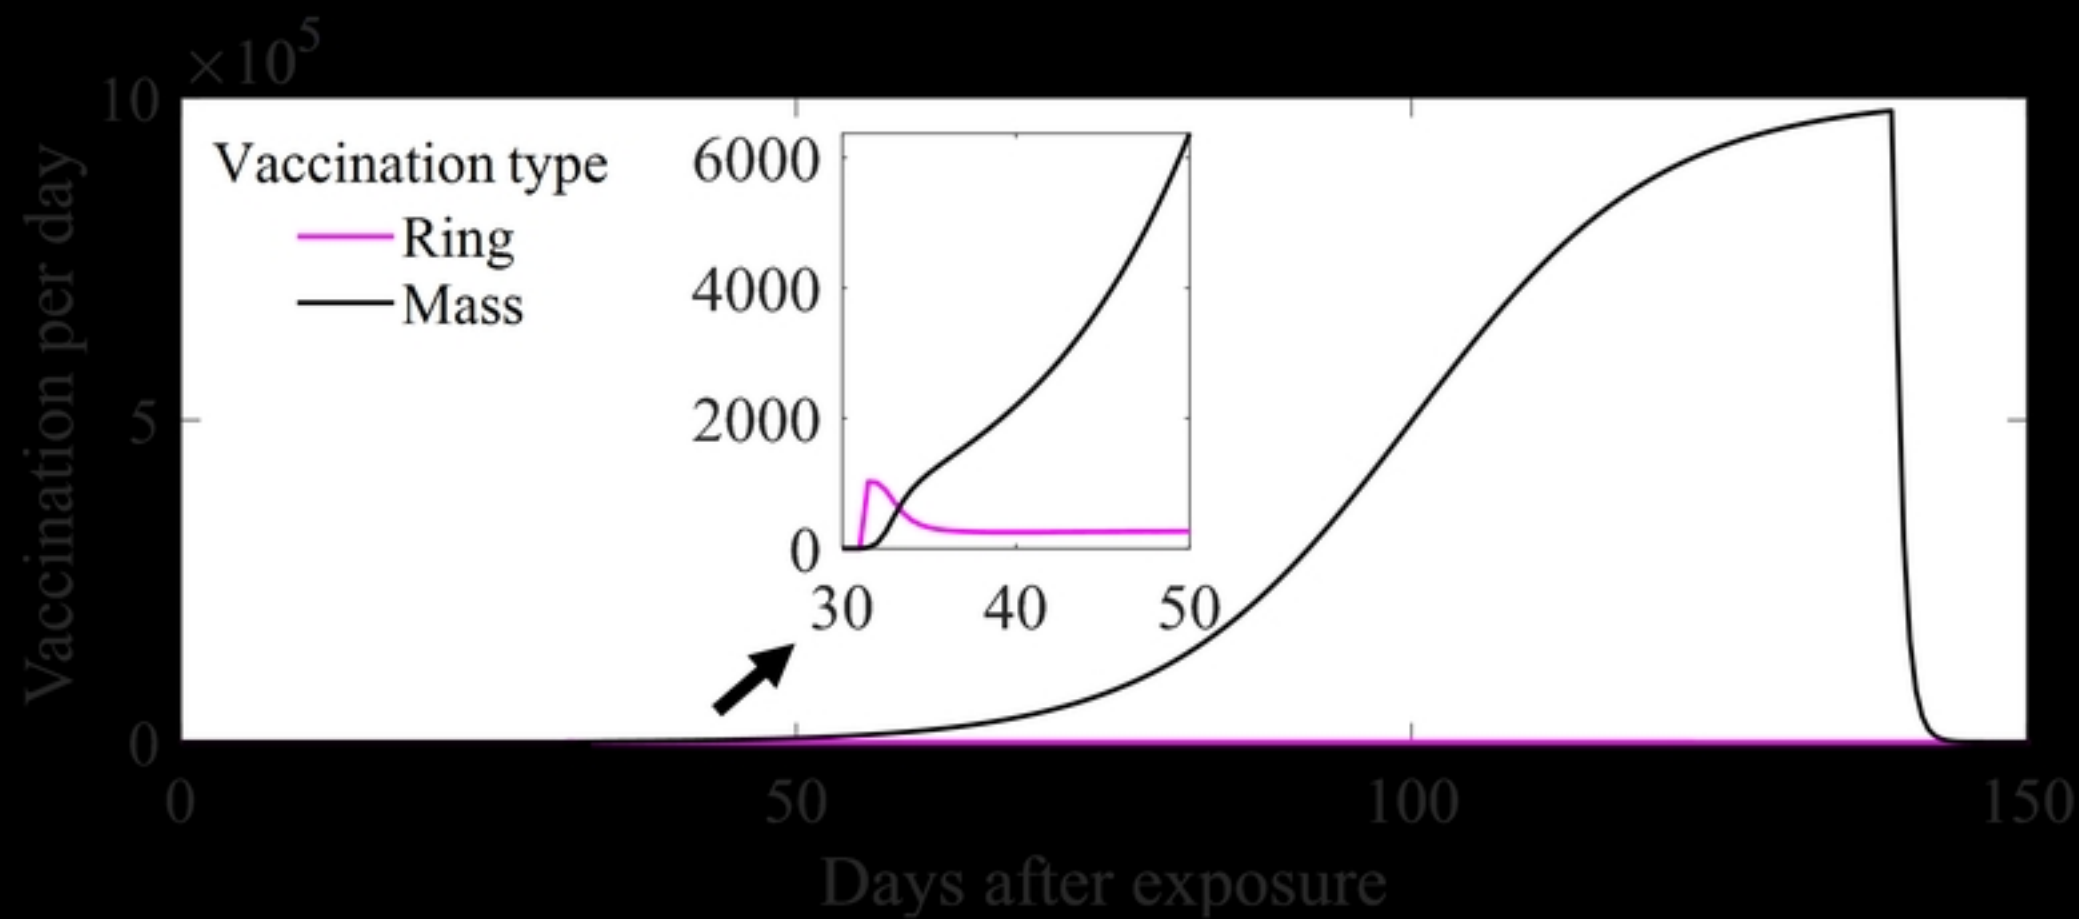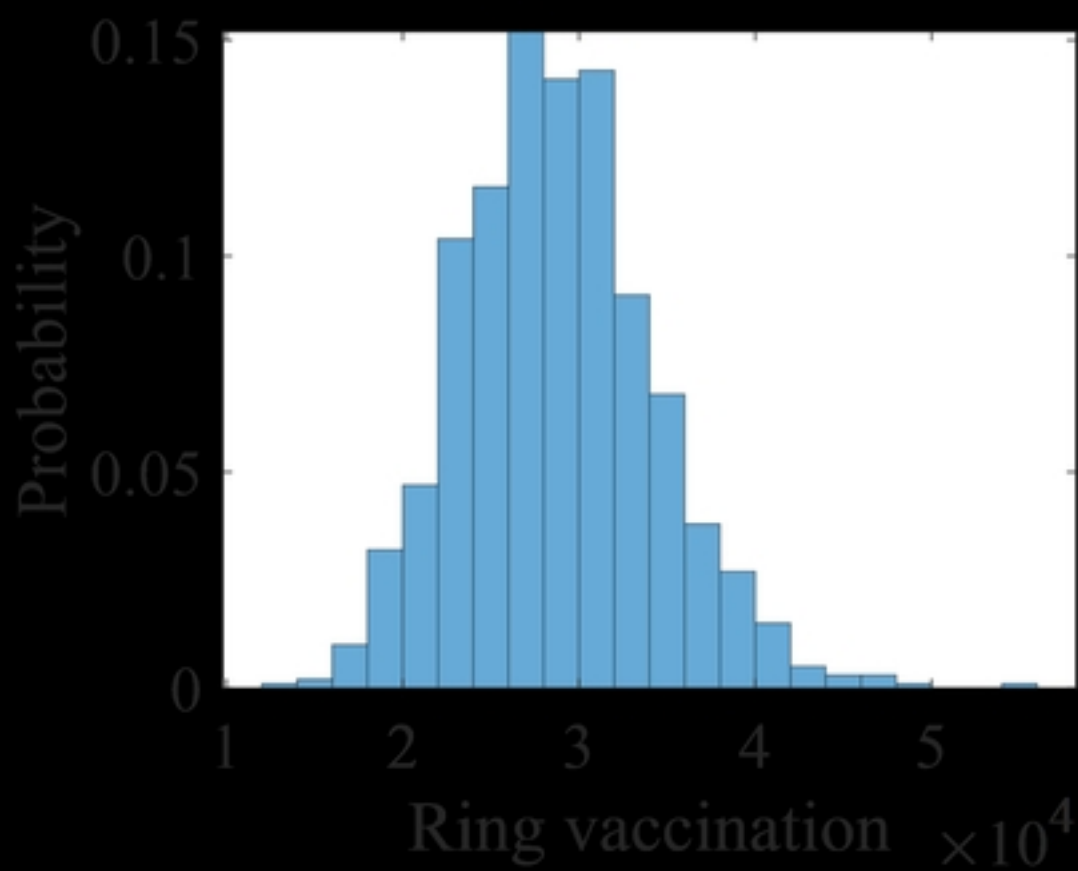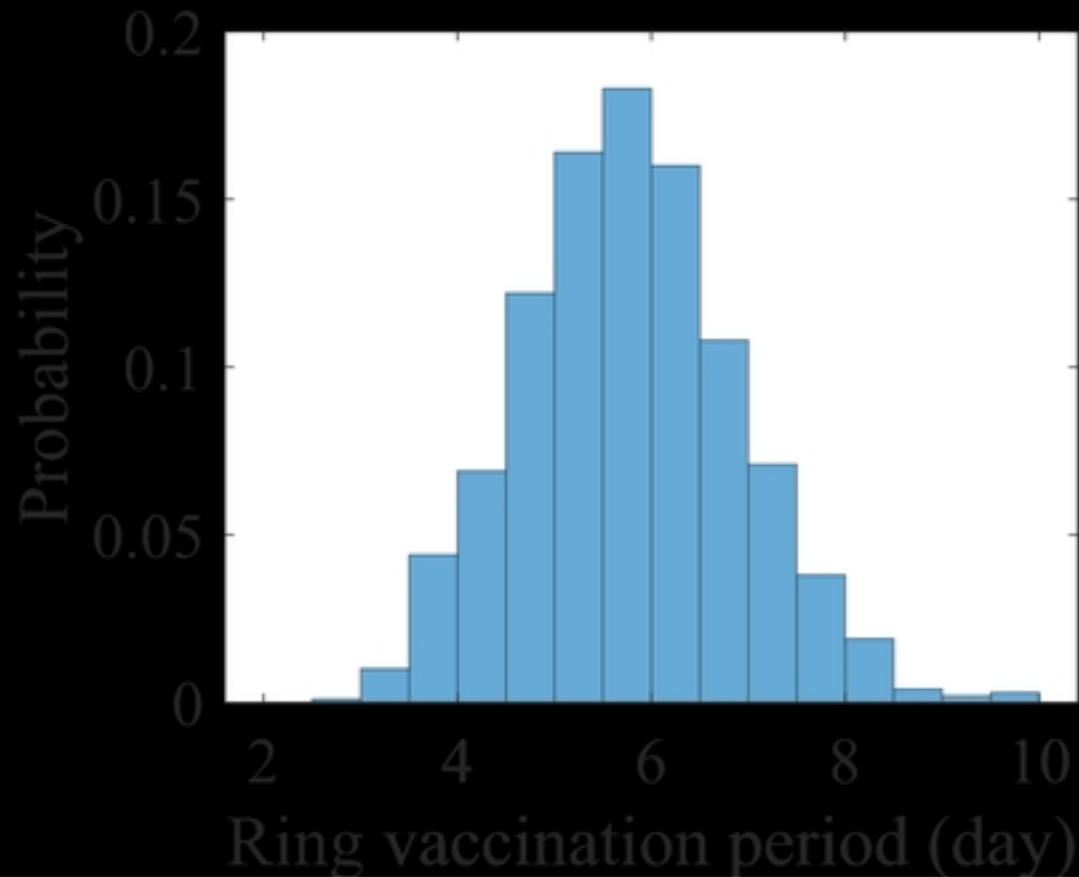

Figure 5

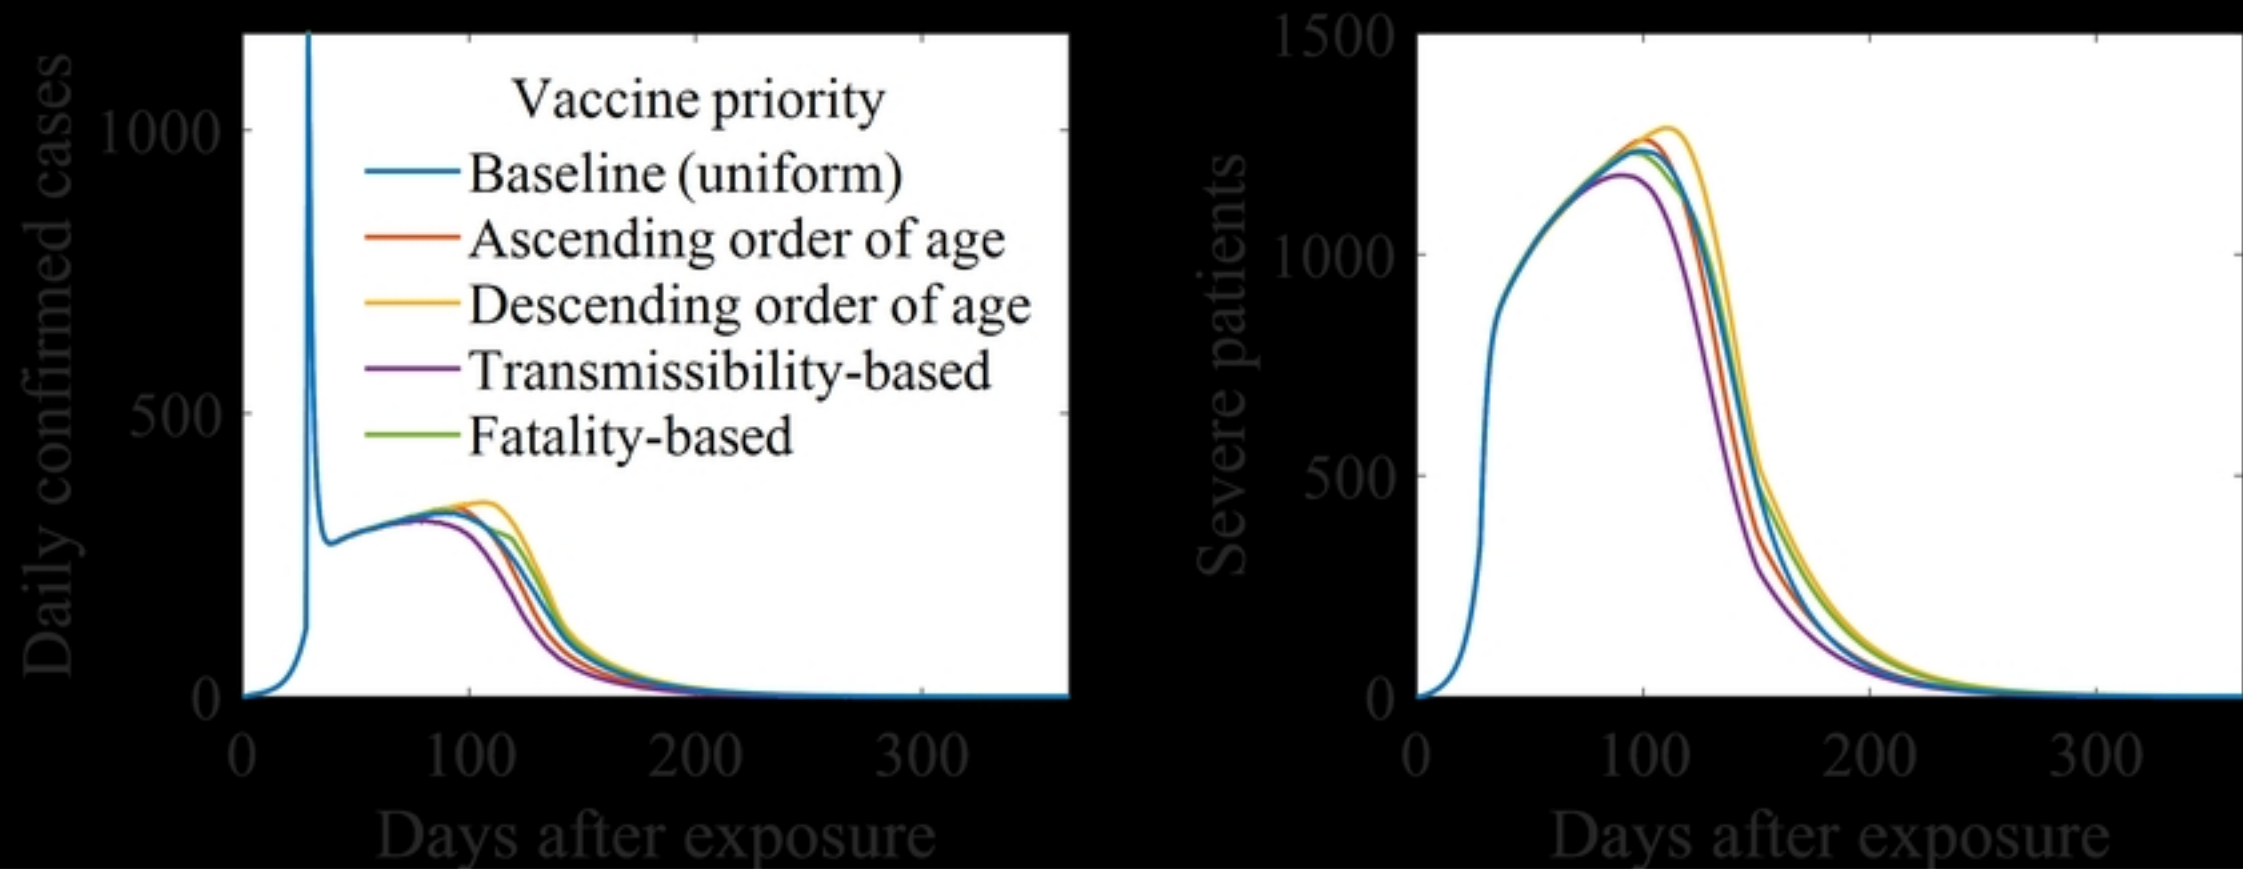

Figure 6

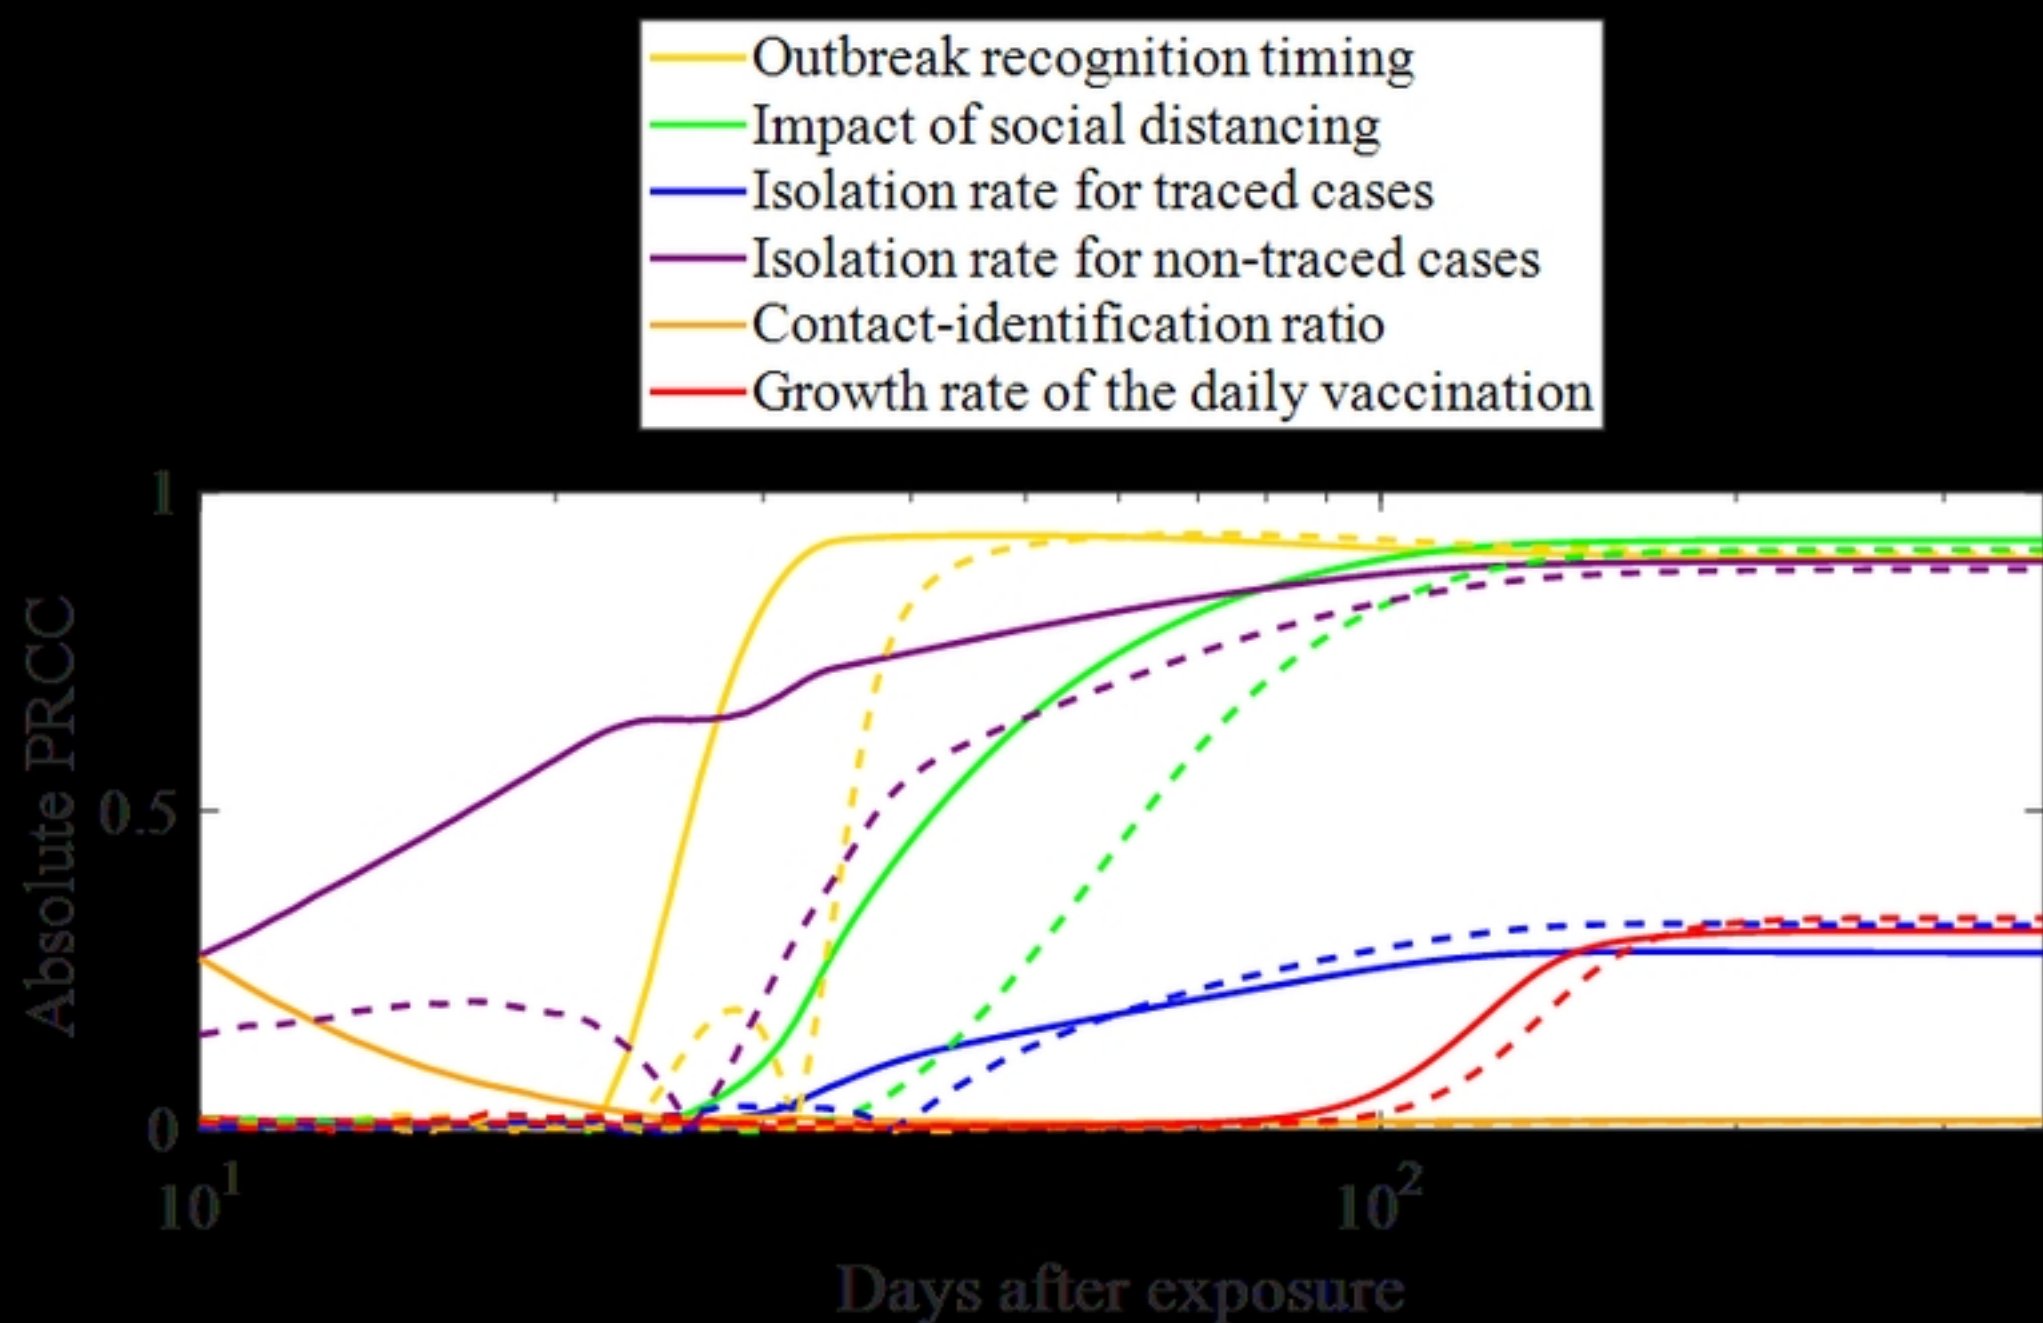

Figure 7

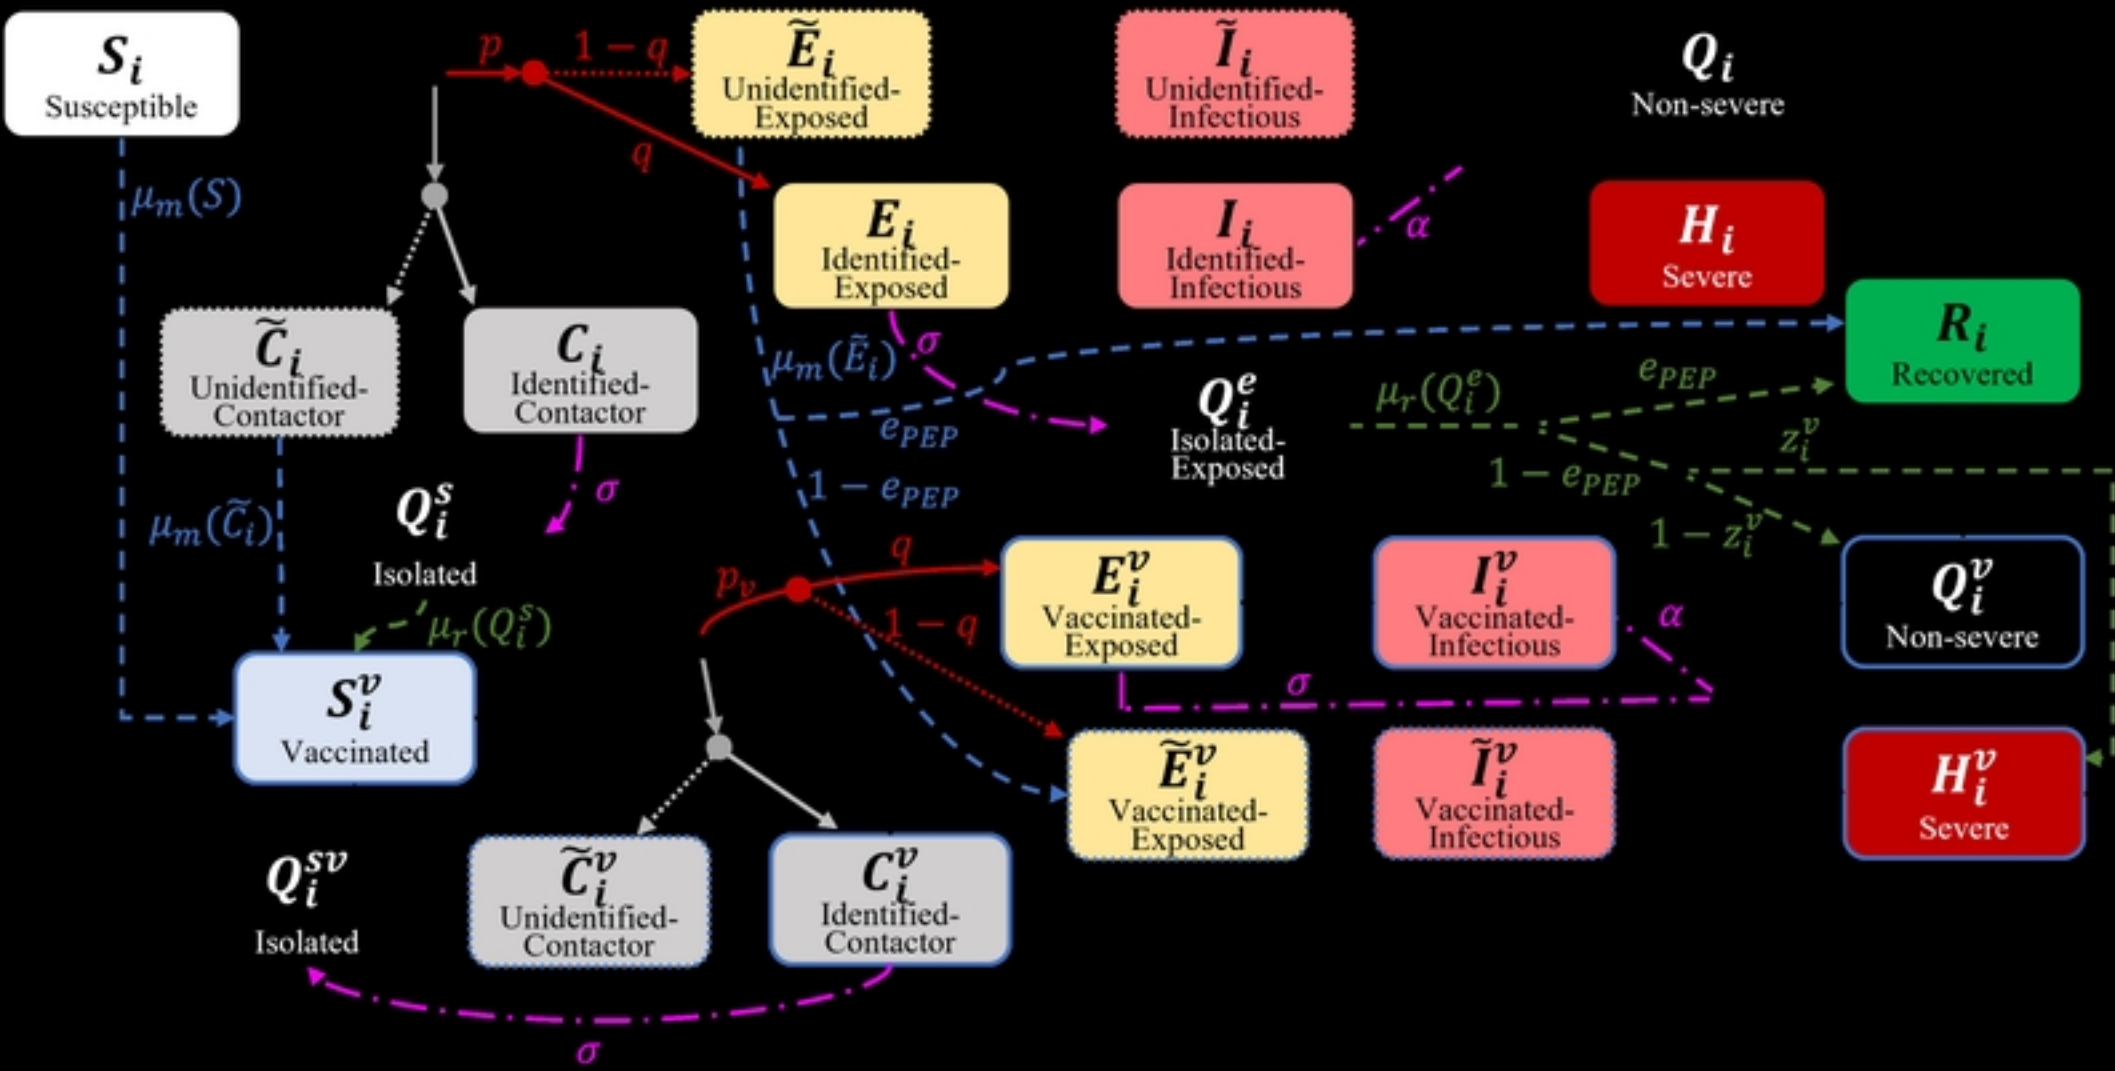

Figure 1

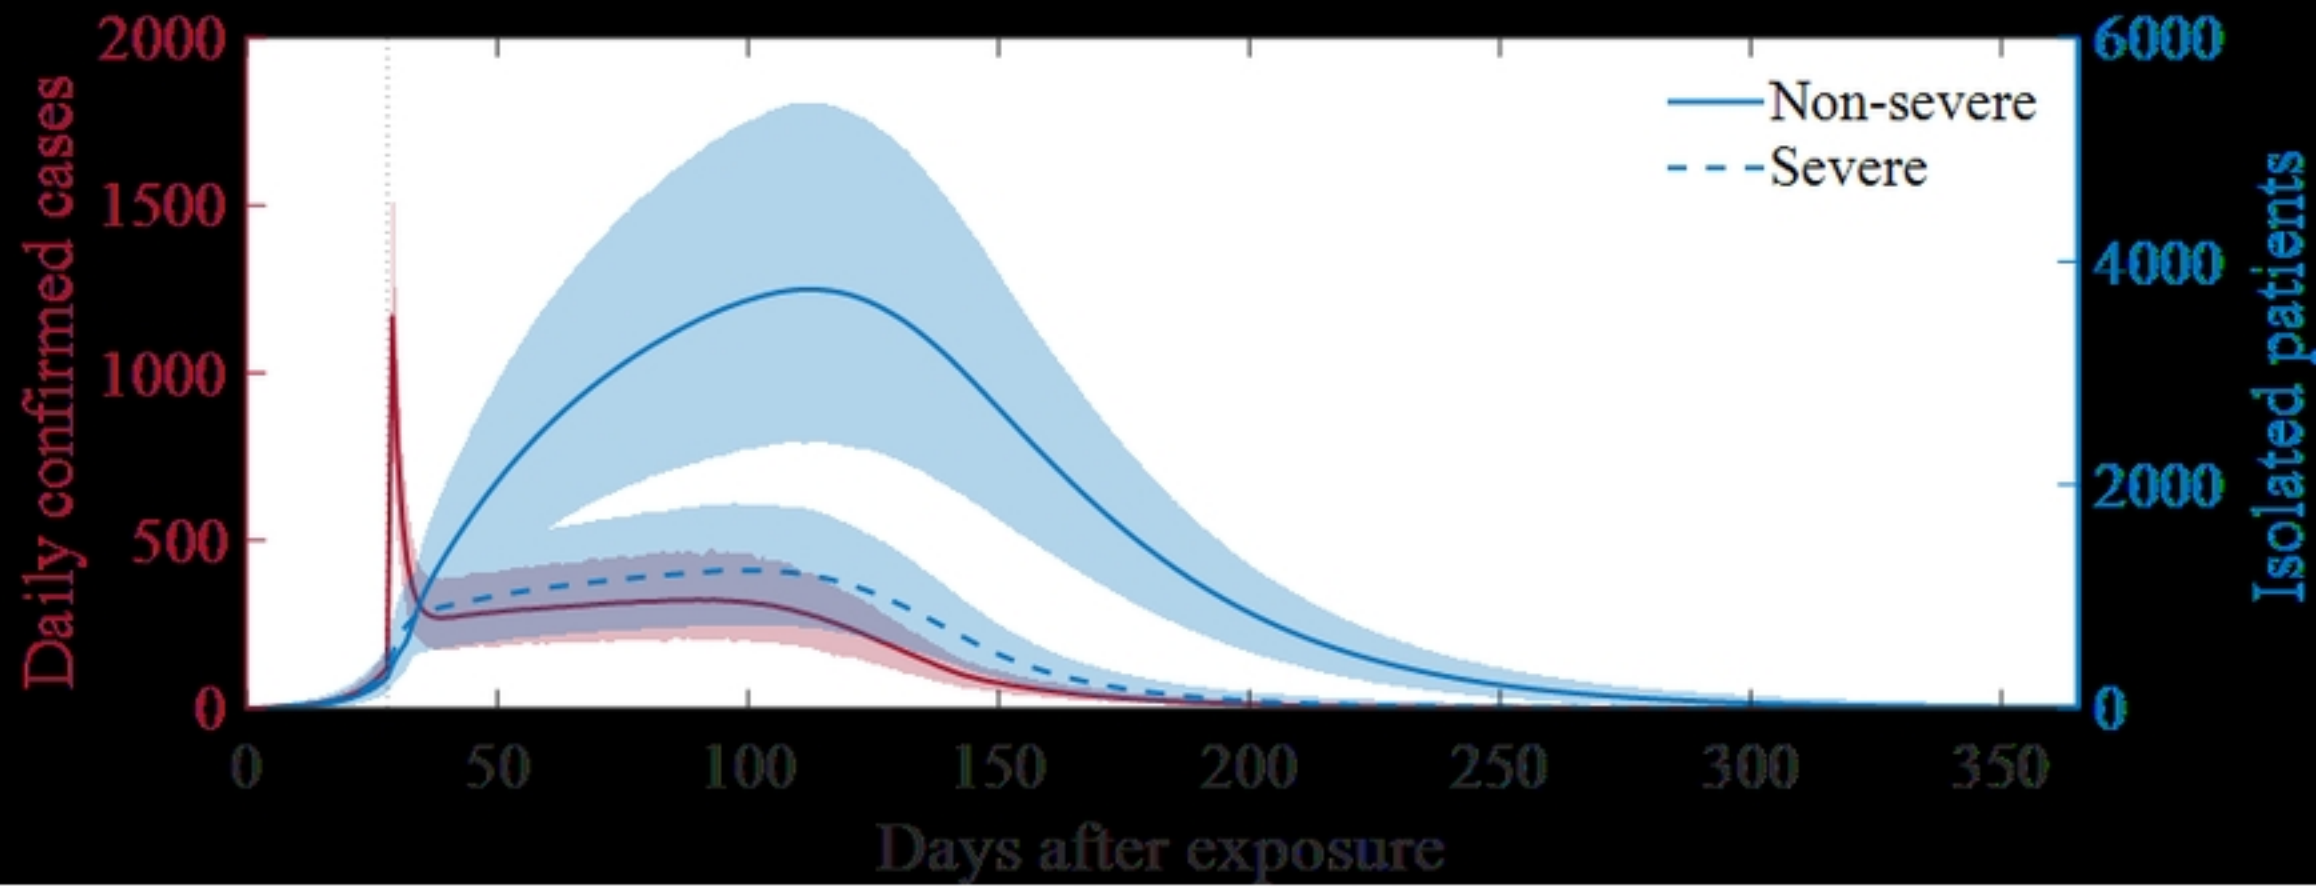

Figure 2

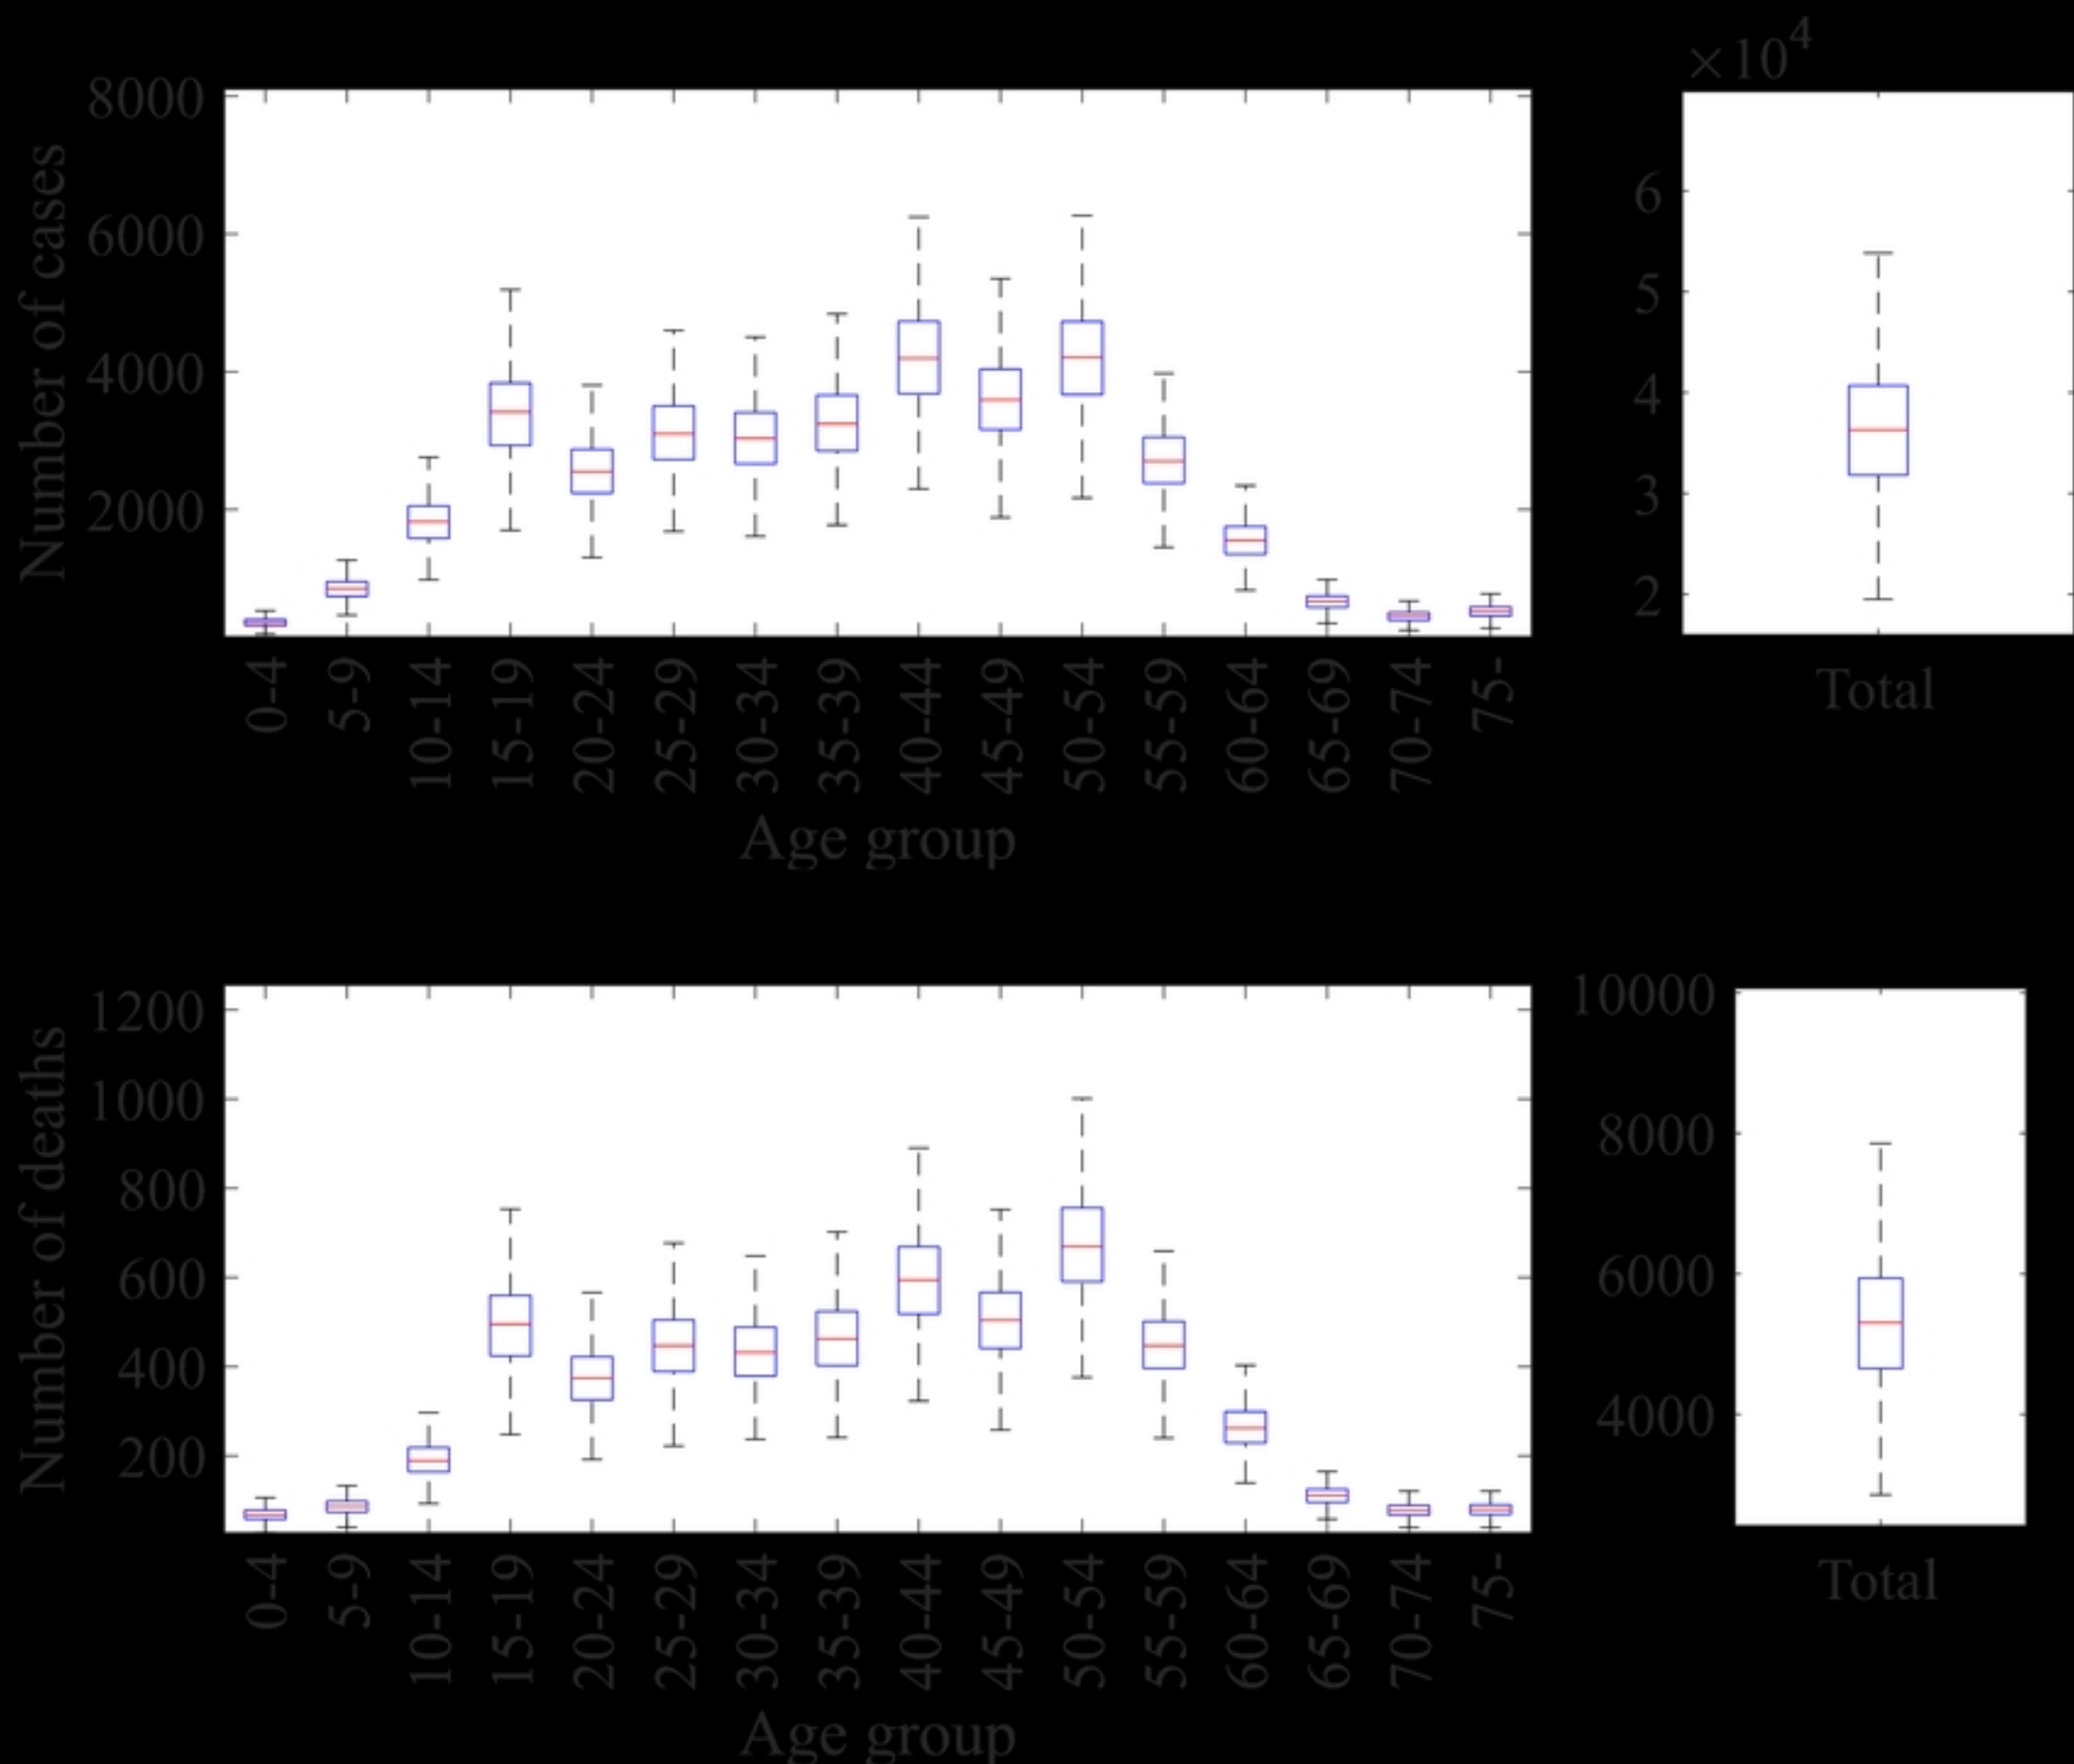

Figure 3
